# Supplementary material for: Biological upgrading of 3,6-anhydro-l-galactose from agarose to a new platform chemical
Source: Royal Society of Chemistry journal article supplement (doi:10.1039/c9gc04265b), 2020-01-01
Supplement: c9gc04265b1.pdf [file c9gc04265b1.pdf]

## Supplementary Information

### **Biological upgrading of 3,6-anhydro-L-galactose from agarose to a new platform chemical**

Dong Hyun Kim,<sup>a</sup> Jing-Jing Liu,<sup>b</sup> Jae Won Lee,<sup>bc</sup> Jeffrey G. Pelton,<sup>d</sup> Eun Ju Yun,<sup>a</sup> Sora Yu,<sup>a</sup> Yong-Su Jin,<sup>\*bc</sup> and Kyoung Heon Kim <sup>\*a</sup>

<sup>a</sup>Department of Biotechnology, Graduate School, Korea University, Seoul 02841, South Korea

<sup>b</sup>Carl R. Woese Institute for Genomic Biology, University of Illinois at Urbana-Champaign, Urbana, IL 61801, USA

<sup>c</sup>Department of Food Science and Human Nutrition, University of Illinois at Urbana-Champaign, Urbana, IL 61801, USA

<sup>d</sup>QB3 Institute, University of California, Berkeley, CA, USA

\*Correspondence should be addressed to K.H.K. (khekim@korea.ac.kr) or Y.-S.J. (ysjin@illinois.edu)

## Supplementary Materials and Methods

**NMR analysis of AHGol and ABol.** A gradient COSY experiment of AHGol was recorded using the pulse sequence cosygpprqf. A total of 2048 and 256 complex points were collected in the direct and indirect dimensions, respectively, with spectral widths of 11.1 ppm, a carrier frequency of 4.79 ppm, and a recycle delay of 2 sec. Pre-saturation during the recycle delay was used to reduce the intensity of the residual water signal. A 2D H2BC experiment of AHGol was recorded using the pulse sequence h2bcetgpl3. A total of 1024 and 64 complex points were recorded in the  $^1\text{H}$  and  $^{13}\text{C}$  dimensions, respectively, with spectral widths of 8 ppm for  $^1\text{H}$  and 70 ppm for  $^{13}\text{C}$ , using carrier frequencies of 4.78 ppm for  $^1\text{H}$  and 70 ppm for  $^{13}\text{C}$ , and a recycle delay for 1.5 s. 1D  $^1\text{H}$ , 2D COSY, and 2D  $^1\text{H}$ - $^{13}\text{C}$  edited HSQC spectra of ABol were recorded in the same manner as the corresponding experiments for AHGol, except that the 2D COSY was acquired without pre-saturation of the water resonance using the pulse sequence cosygpprqf. To obtain  $^{13}\text{C}$ - $^{13}\text{C}$  correlations, a 1,1 Adequate spectrum was recorded using the pulse sequence adeq11etgprdsp. A total of 1024 and 128 complex points were recorded in the  $^1\text{H}$  and  $^{13}\text{C}$  dimensions, respectively, with spectral widths of 11 ppm ( $^1\text{H}$ ) and 60 ppm ( $^{13}\text{C}$ ), using carrier frequencies of 4.69 ppm ( $^1\text{H}$ ) and 82 ppm ( $^{13}\text{C}$ ), and a recycle delay for 2 s.

**GRE3 expression of D452-L124 with AB.** Strain D452-L124 was grown in YPD, harvested, and transferred to synthetic complete medium containing 50 g/L glucose and 10 g/L AB, respectively. Total RNA from yeast cells was prepared using the RNeasy Mini Kit (Qiagen) according to the manufacturer's instructions. Each cDNA was prepared from each extracted RNA using the SuperScript II Reverse

Transcriptase kit (Thermo Fisher Scientific) according to the provided instructions. To investigate expression of *GRE3*, PCR was performed using cDNA with the following primer pairs *cGRE3-F* and *cGRE-R*. *ACT1* was used as a house keeping gene, and it was also confirmed using PCR with the following primer pairs *cACT1-F* and *cACT1-R*. Same volume of PCR products were loaded on a DNA gel.

**Table S1 Primers, plasmids, and strains used in this study**

| <b>Primer</b>  | <b>Primer sequence</b>                                                 | <b>Source</b>                   |
|----------------|------------------------------------------------------------------------|---------------------------------|
| <i>GRE3-F</i>  | 5'-CATATGTCTTCACTGGTACTCTTAATAACGGT-3'                                 | This study                      |
| <i>GRE3-R</i>  | 5'-GCGGCCGCGGCAAAAGTGGGAATTTACCATCCAA-3'                               | This study                      |
| <i>LAC12-F</i> | 5'-tctagagcggccgc <u>actag</u> tccaccatggcaga tcattcgagcag-3'          | This study                      |
| <i>LAC12-R</i> | 5'-tctagagcggccgc <u>ctgact</u> taaacagattctg cctctg-3'                | This study                      |
| <i>LAC4-F</i>  | 5'-tctagagcggccgc <u>actag</u> tccaccatgtcttg ccttattcctgagaat-3'      | This study                      |
| <i>LAC4-R</i>  | 5'-tctagagcggccgc <u>ctgact</u> tattcaaaagcga gatcaaacctc-3'           | This study                      |
| gCS8-U         | TGATTCAATCATTCTTATTGgttttagagctagaaatagcaag                            | Liu, <i>et al.</i> <sup>1</sup> |
| gCS8-D         | CAATAAGAATGATTGAATCAgatcatttatctttcactgcgga                            | Liu, <i>et al.</i> <sup>1</sup> |
| CS8-IU         | caaaattacctacggaattagtgaaaggccaaaatctaagtgtacaataAATTAACCCTCACTAAAGGGA | Liu, <i>et al.</i> <sup>1</sup> |
| CS8-ID         | gaccgtccctgtgtgtaccagtggttagggttctctcggtagcttctGTAATACGACTCACTATAGGGC  | Liu, <i>et al.</i> <sup>1</sup> |
| CS8-CKU        | agtggaacatagaagggg                                                     | Liu, <i>et al.</i> <sup>1</sup> |
| CS8-CKD        | Taagcagcccagtgaac                                                      | Liu, <i>et al.</i> <sup>1</sup> |
| gCS6-U         | GATACTTATCATTAAGAAAgttttagagctagaaatagcaag                             | This study                      |
| gCS6-D         | TTTTCTTAATGATAAGTATCgatcatttatctttcactgcgga                            | This study                      |
| CS6-IU         | aacctgaggagaagttttttaccctctccacagatcCAGGAAACAGCTATGACCATG              | This study                      |
| CS6-ID         | taattaggtagaccgggtagattttccgtaaccttggtgtcTGTA AACGACGGCCAGT            | This study                      |
| CS6-CKU        | gtctgccgaaattctgtg                                                     | This study                      |
| CS6-CKD        | cggtcagaaagggaaatg                                                     | This study                      |
| <i>cGRE3-F</i> | 5'- TCCTCCTTCGGTCCTCAATC-3'                                            | This study                      |
| <i>cGRE3-R</i> | 5'-CCTTCAATTCTTGCTCCGTT-3'                                             | This study                      |
| <i>cACT1-F</i> | 5'- AGGAATTATACGGTAACATCGTTATGTC-3'                                    | This study                      |
| <i>cACT1-R</i> | 5'-TTGTGGTGAACGATAGATGGA-3'                                            | This study                      |
| <b>Plasmid</b> | <b>Description</b>                                                     | <b>Source</b>                   |
| p423-pGPD      | pSR423-pTDH3-tCYC1                                                     | Mumberg <sup>2</sup>            |
| p425-pGPD      | pSR425-pTDH3-tCYC1                                                     | Mumberg <sup>2</sup>            |
| pRS423-        | pRS423-pGPD harboring <i>LAC12</i> gene from <i>K. lactis</i> Y-8279   | This study                      |

| pGPD-LAC12 |                                                                     |                                   |
|------------|---------------------------------------------------------------------|-----------------------------------|
| pRS425-    | pRS425-pGPD harboring <i>LAC4</i> gene from <i>K. lactis</i> Y-8279 | This study                        |
| pGPD-LAC4  |                                                                     |                                   |
| Cas9-NAT   | p414-TEF1p-Cas9-CYC1t-NAT1                                          | Zhang <i>et al.</i> <sup>3</sup>  |
| p42K-gCS8  | pRS42K carrying guide RNA for integration at CS8 locus              | Liu, <i>et al.</i> <sup>1</sup>   |
| p42H-gCS6  | pRS42H carrying guide RNA for integration at CS6 locus              | This study                        |
| Strain     | Description                                                         |                                   |
| D452-2     | <i>MAT<math>\alpha</math> leu2 ura3 his3 can1</i>                   | Hosaka <i>et al.</i> <sup>4</sup> |
| D452-L12   | D452-2 with CS8- <i>LAC12</i> integration                           | This study                        |
| D452-L124  | D452-2 with CS8- <i>LAC12</i> , CS6- <i>LAC4</i> integration        | This study                        |

### Supplementary References

1. Liu, J.J. et al. Metabolic engineering of probiotic *Saccharomyces boulardii*. *Appl. Environ. Microbiol.* **82**, 2280-2287 (2016).
2. Mumberg, D., Müller, R. & Funk, M. Yeast vectors for the controlled expression of heterologous proteins in different genetic backgrounds. *Gene* **156**, 119-122 (1995).
3. Zhang, G.C. et al. Construction of a quadruple auxotrophic mutant of an industrial polyploidy *Saccharomyces cerevisiae* using RNA-guided Cas9 nuclease. *Appl. Environ. Microbiol.* 02310-02314 (2014).
4. Hosaka, K., Nikawa, J.I., Kodaki, T. & Yamashita, S. A dominant mutation that alters the regulation of *INO1* expression in *Saccharomyces cerevisiae*. *J. Biochem.* **111**, 352-358 (1992).

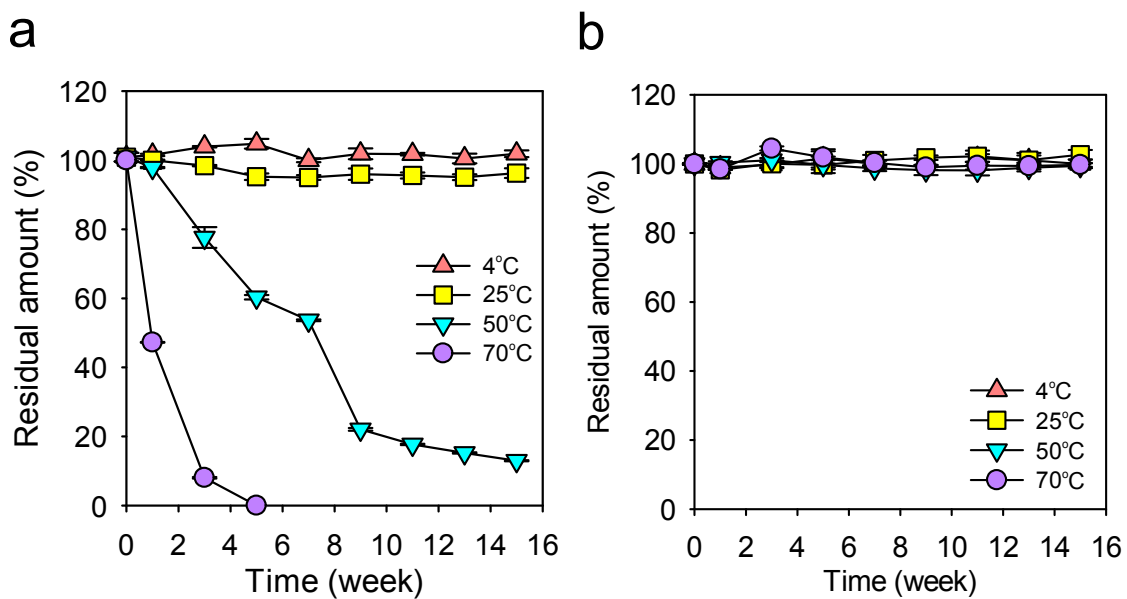

**Fig. S1 Thermal stability of AHG and AHGol.** **a** AHG and **b** AHGol were incubated at various temperatures ranging from 4 to 70 °C for 15 weeks. Values and error bars represent means and standard deviations of duplicate experimental data.

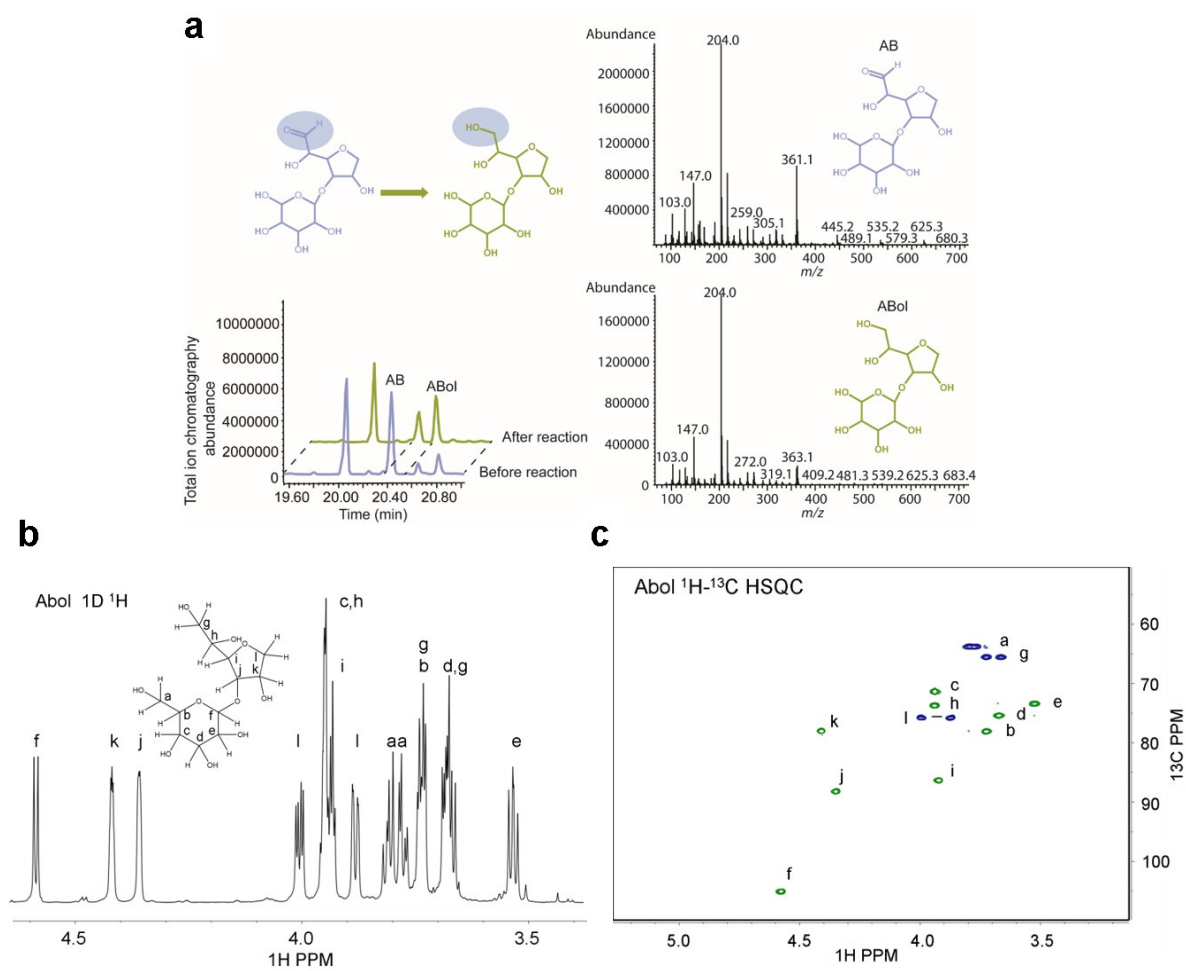

**Fig. S2** *In vitro* enzymatic conversion of AB to ABol with AR. **a** Total ion chromatograms and spectra of AB and ABol obtained for GC/MS analysis of AR enzymatic reaction against AB. **b–c** NMR spectra of ABol produced from AB by AR. **b** 1D  $^1\text{H}$  NMR spectrum. **c**  $^1\text{H}$ - $^{13}\text{C}$  HSQC NMR spectrum.

**Table S2  $^1\text{H}$ - and  $^{13}\text{C}$  chemical shifts from the NMR spectroscopy of AHGol produced by AR**

|   | $^1\text{H}$ chemical shift (ppm) | $^{13}\text{C}$ chemical shift (ppm) |
|---|-----------------------------------|--------------------------------------|
| 1 | 3.63 / 3.70                       | 65.6                                 |
| 2 | 3.83                              | 74.1                                 |
| 3 | 3.73                              | 87.4                                 |
| 4 | 4.13                              | 81.0                                 |
| 5 | 4.24                              | 79.5                                 |
| 6 | 3.99 / 3.83                       | 75.4                                 |



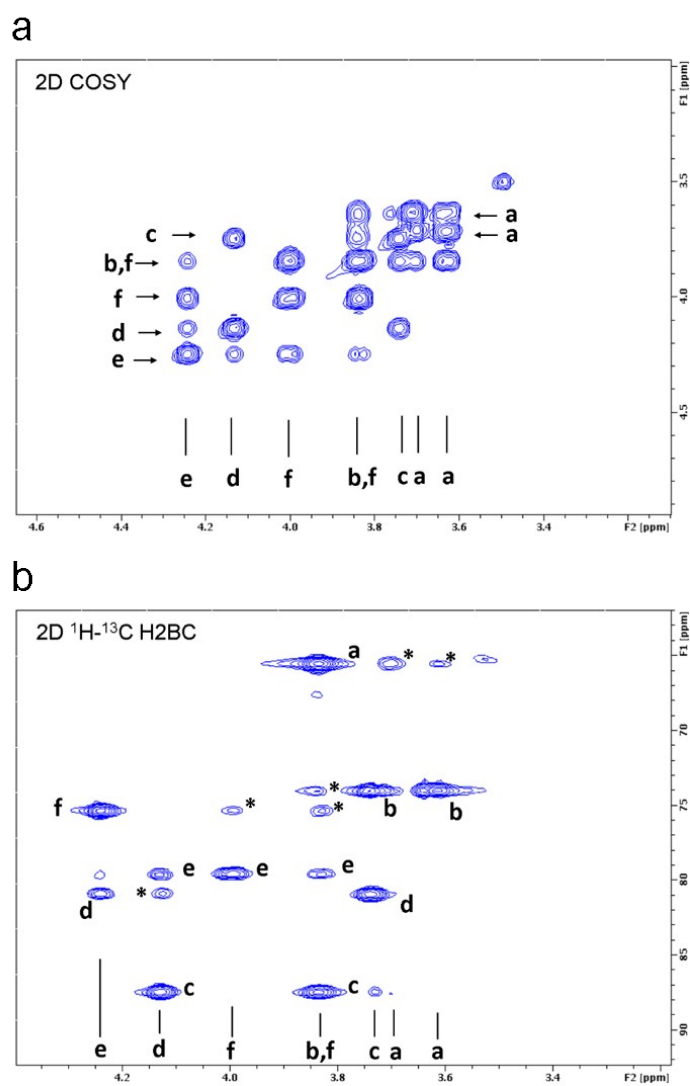

**Fig. S3 NMR analysis of AHGol produced by AR. a** 2D proton gradient COSY spectrum of AHGol. **b** 2D  $^1\text{H}$ - $^{13}\text{C}$  H2BC spectrum of AHGol showing  $^{13}\text{C}$ - $^{13}\text{C}$  neighbors for the four CH and two  $\text{CH}_2$  groups.

**Table S3**  $^1\text{H}$ -and  $^{13}\text{C}$  chemical shifts from the NMR spectroscopy of ABol produced by AR

|    | $^1\text{H}$ chemical shift (ppm) | $^{13}\text{C}$ chemical shift (ppm) |
|----|-----------------------------------|--------------------------------------|
| 1  | 3.80 / 3.77                       | 63.8                                 |
| 2  | 3.72                              | 78.0                                 |
| 3  | 3.94                              | 71.3                                 |
| 4  | 3.67                              | 75.3                                 |
| 5  | 3.52                              | 73.4                                 |
| 6  | 4.58                              | 105.1                                |
| 7  | 3.72 / 3.66                       | 65.6                                 |
| 8  | 3.94                              | 73.7                                 |
| 9  | 3.92                              | 86.3                                 |
| 10 | 4.35                              | 88.2                                 |
| 11 | 4.41                              | 78.0                                 |
| 12 | 3.99 / 3.87                       | 75.8                                 |

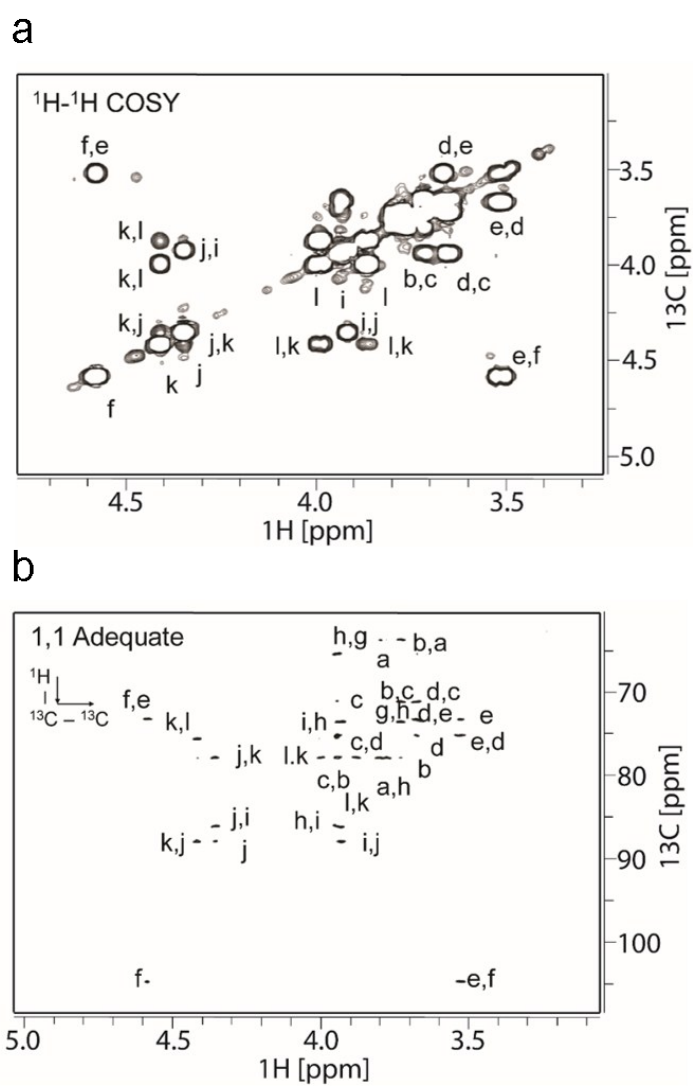

**Fig. S4 NMR analysis of ABol produced by AR. a**  $^1\text{H}$ - $^1\text{H}$  COSY NMR spectrum. **b** 1,1 Adequate NMR spectrum.

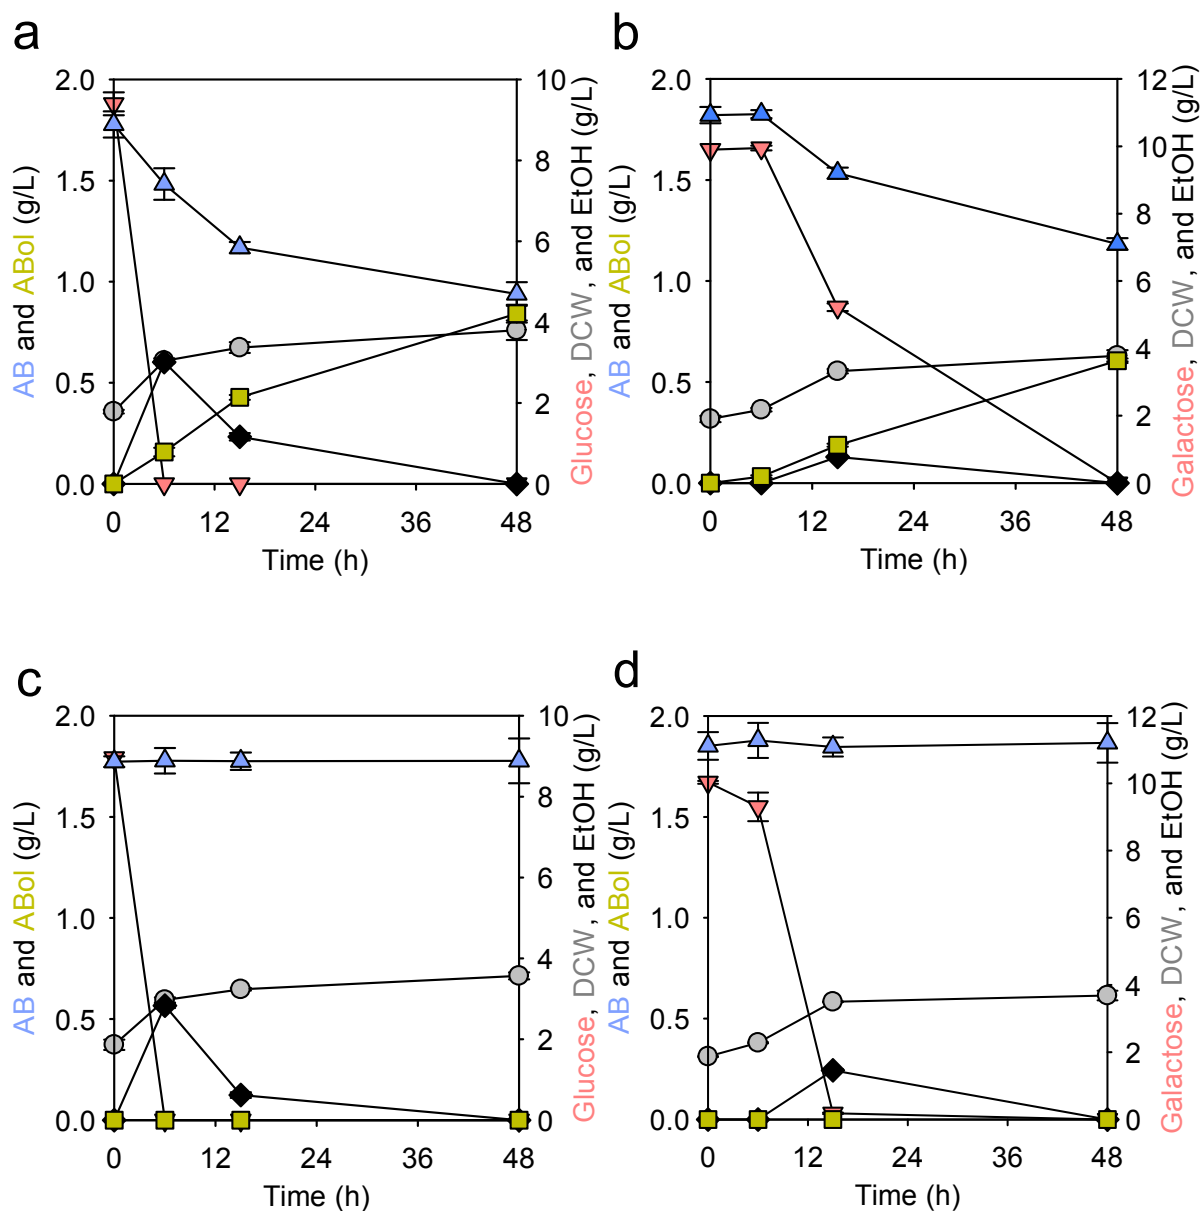

**Fig. S5 Comparison of the AB uptake abilities and culture profiles of strain D452-L12 and the parental strain D452-2. a** D452-L12 with glucose, **b** D452-L12 with galactose, **c** D452-2 with glucose, and **d** D452-2 with galactose. The strains were cultivated in Verduyn medium containing 1.8 g/L of AB and glucose or galactose as the carbon source. Values and error bars represent means and standard deviations of duplicate experiments.

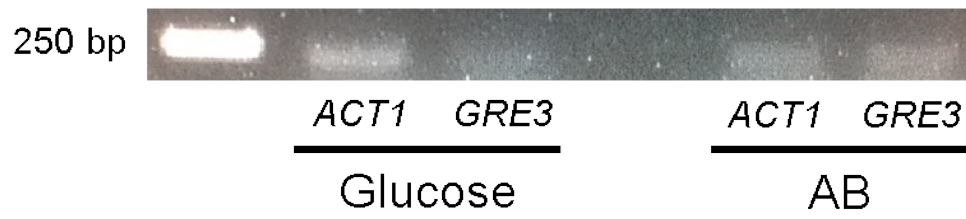

**Fig. S6 Expression of the endogenous gene *GRE3* encoding AR in strain D452-L124 on AB compared to glucose. *ACT1* was used as a house-keeping gene.**

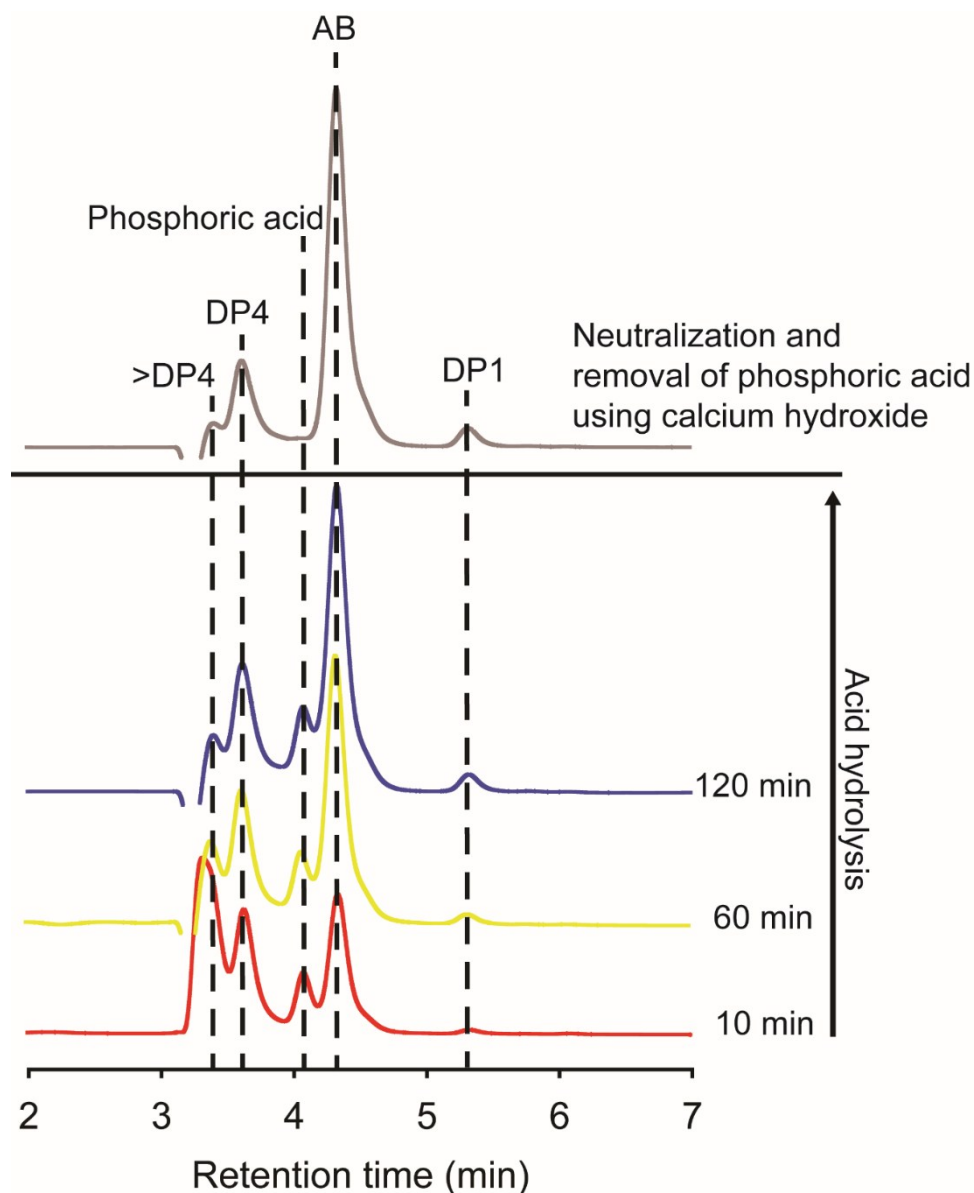

**Fig. S7 HPLC analysis of the reaction products during acid hydrolysis of agarose to produce agarose hydrolysate containing mainly AB.** Acid hydrolysis was performed on 20% (w/w) agarose at 95°C for 120 min using 2% (w/v) H<sub>3</sub>PO<sub>4</sub>. Reaction products were analyzed by HPLC equipped with an RID detector and a Rezex ROA-organic acid H<sup>+</sup> (8%) column using 0.005 N H<sub>2</sub>SO<sub>4</sub> as a mobile phase at a flow rate of 0.6 ml/min at 65 °C.

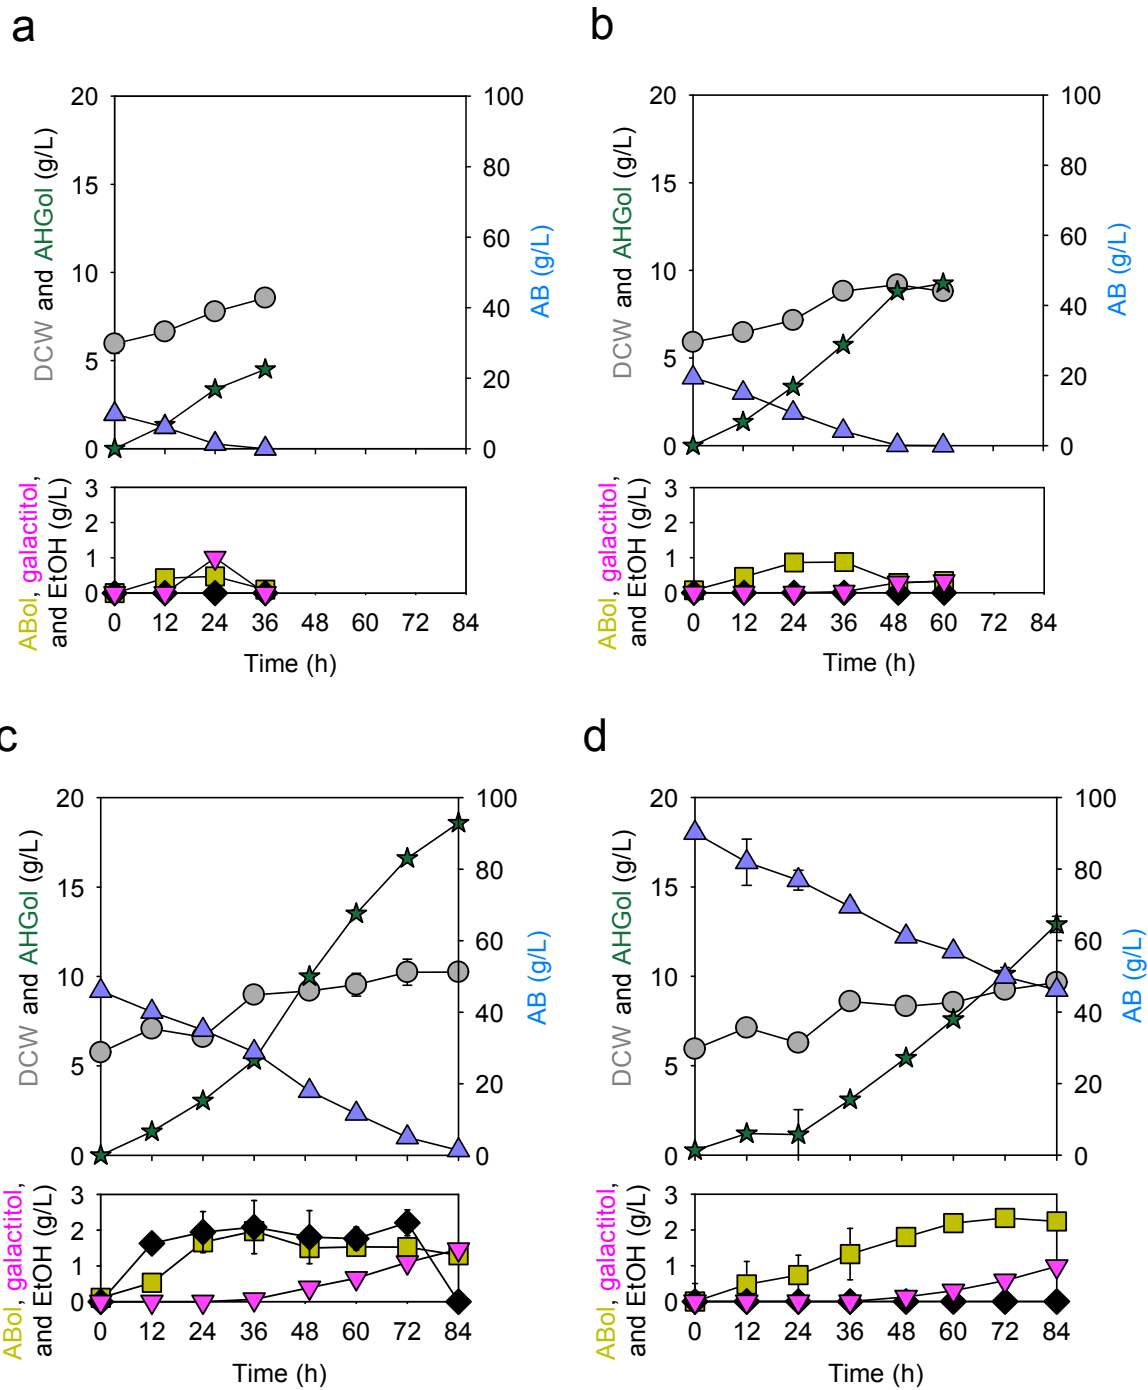

**Fig. S8 Batch fermentation profiles of strain D452-L124 at the increased initial cell density at various AB loadings.** At 6 g/L of the initial cell density, the initial AB loadings were **a** 10 g/L, **b** 20 g/L, **c** 45 g/L, and **d** 90 g/L AB in medium. Values and error bars represent means and standard deviations of duplicate experiments.

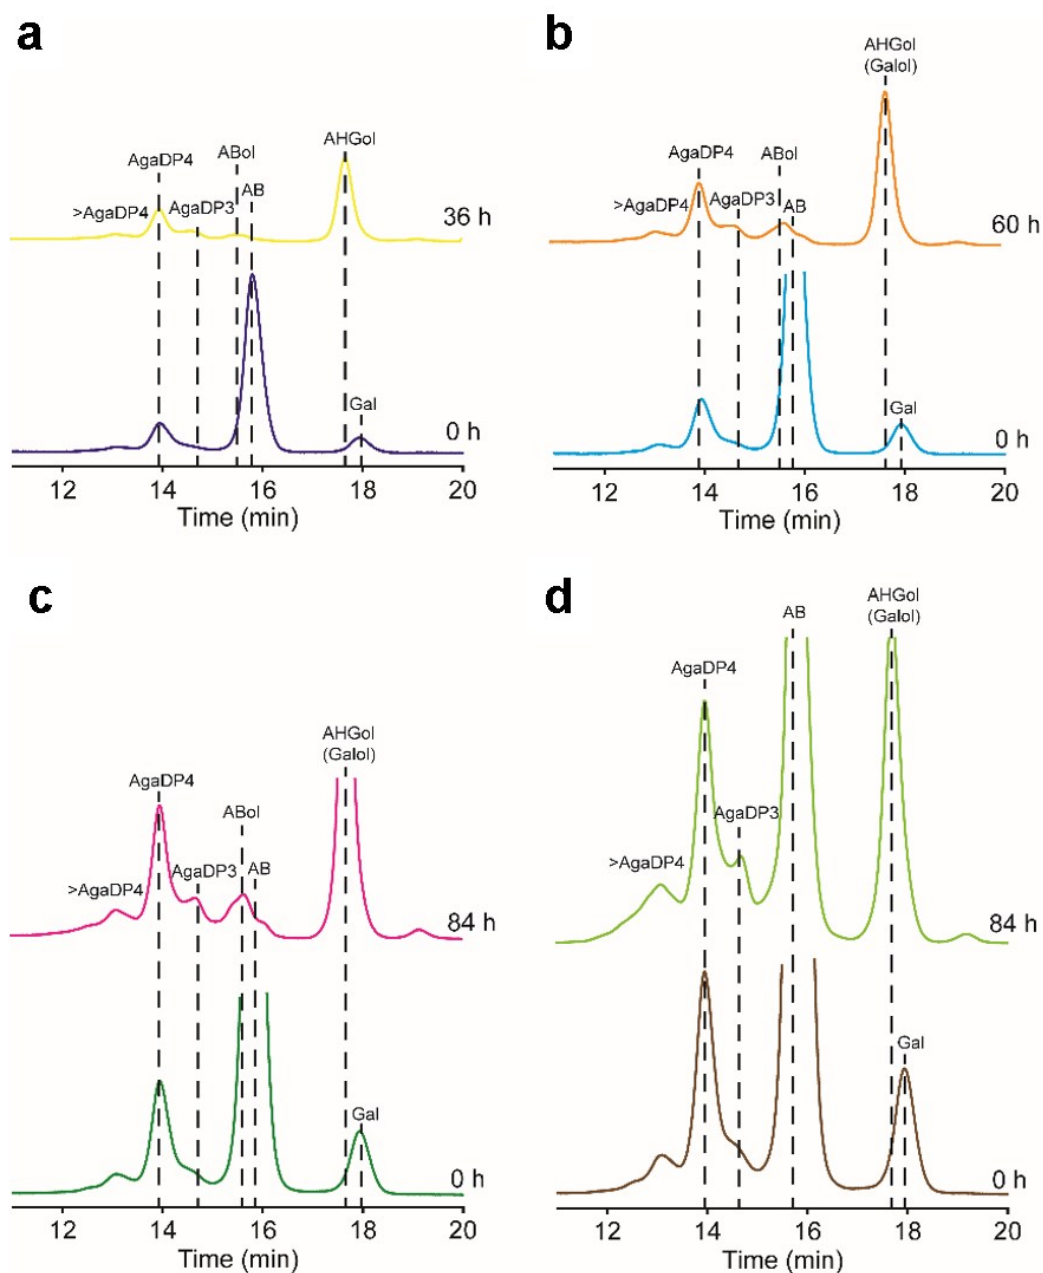

**Fig. S9 Transglycosylation activity of  $\beta$ -galactosidase in D452-L124 during the batch fermentation for AHGol production.** For each fermentation, **a** 10 g/L, **b** 20 g/L, **c** 45 g/L, and **d** 90 g/L of AB were added to its culture media and analyzed at 0 h and final point using HPLC equipped with the RID detector and a KS-802 column using distilled water as a mobile phase at a flow rate of 0.5 mL/min at 85 °C.



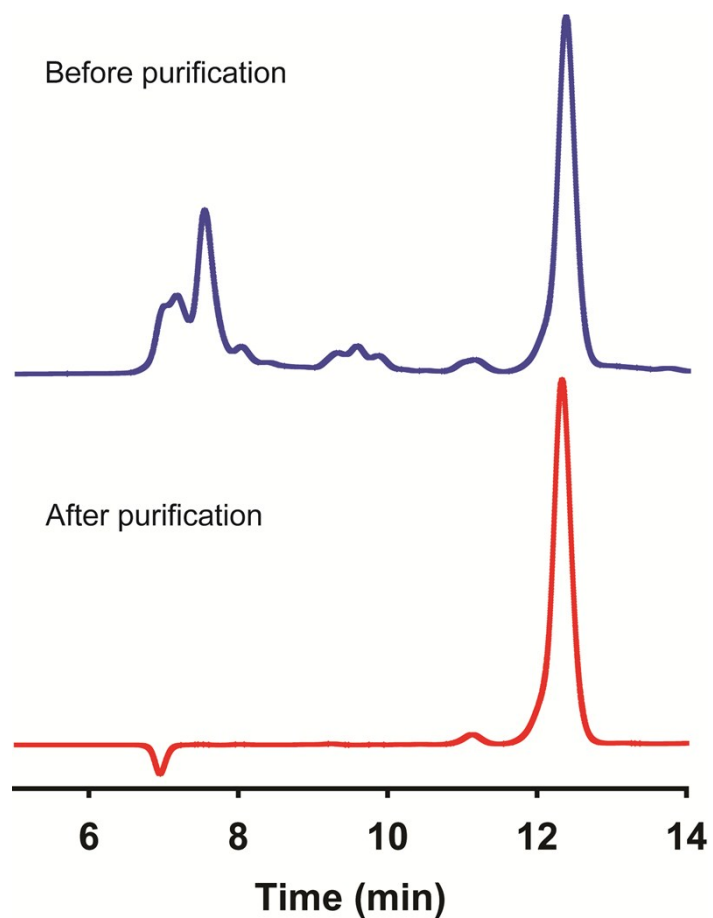

**Fig. S10 Purification of AHGol from the fermentation culture broth of agarose hydrolysate.** Purification was performed using size-exclusion chromatography with G-10 resin. The chromatograms were obtained using HPLC analysis with a KS-802 column.

## Supplementary information of the intergenic sites for Cas9-based integration

**NNNN: CDS of functional gene**

**NNNN: CDS of not essential protein, or protein with no function (or unknown function)**

**NNNN: tRNA**

**NNNN:  $\delta$  sequence**

nnnn: Non-coding region

nnnn: PAM sequence

nnnn: Target sequence for gRNA

nnnn: Homologous region for integration

nnnn: sequencing primer site

## Supplementary information of the intergenic site CS8 for CRISPR-Cas9-based integration

[CS8 region, Chromosome XVI]

.....TAGATCTTATACAAAAGCAACTGCGCGCTGTGGTAAAGCTACGGAAACAATGTCCTATCTG  
TGGAAGGTTTGTTCGAGACCTTCAACTGAGGACTCATTACTTAATACATACGGGAGACAC  
ACTTTCAAATGTA CTGGGAGCATTGCAACAAATCTTTCAATGTCAAGAGTAACATGTTAAGG  
CATTAAAGAACCCATCAAAGAAAATAGCAAAGAAAAACATCAGTGAaagcattgttagaatatttgttt  
cagtgtatttgatgtaggtgacacttttaccagtaaaatgagtatagatatgtattgtccatataatattacatgtagccaacaatcaat  
tttactgactccgattttgaatagtgagaggattttgttcgaattataattctacaagaaattgttgcgaatgcatcagcattgtaatacggttct  
atactgccgcacgatacattttattctgtctagttcgttaagacaaaggacctttcatttagtacaacgttgcgacacggatgcttgatgaatctct  
gtaccaggaattcaattacctgactagtagcagttcactatcaaaaaaaaaaaaaaggtaaattggtataatcatggttaaagaacaaaca  
gcctcttctctacaaaagtatgtaaattgtaggttagtcaaatgcggtcacgtatatgccaacgttgtaatatataatgatccattggaacaatg  
aagttacagaagctcaaaattaatgcaagaataattacgtcaaggagtcatacaaaactaagaaaacaaaggaattgactaagttgag  
cgcaatgatataccatgctgatattctgattcatacatatcgtttctgtcattcaatggaagtctttatcaattaccacaaccttagattgtgctt  
attattggtcaaaaggagttcatgctagtagtcaacctgaagtattggaacatagaaggggataaattcctatcggataaca  
aagaaaaaccaggattattgtttaccaccacatttcaaaccttcccgctgaattcctactaccctcattgaaagaacgcttccactcttaggtt  
ggcgtgtatcatctttctccattcaatgaccaagacttaatttgggttaaactcttattcttgcagtttaaccaacaaaattacctacggtaatt  
agtgaaggccaaaatctaattgacaatagattcaatcattctattgaggagaagctaccgagaagaacctaccactggtacaacacaa  
gggaacggtctcattgacctgacataaccgggaaggtaacacatgaatatgctgtgattgacatctccaatccaaactataggaatgaaa  
aattttttgggtacaatgtctctcacaatatcgtattctgtcagcaatgttccaaggatgacagactcttctaagaaaagattcaagttcaaa  
attacataacagtgaaactatgcagaaaatttactctagaccacgcatthaacaataatgtttgcccgcaacaataaagtattggtcgcttaag  
acgttatcagttatttatgagaagggtttaccattcgtgctccatactaaaaccaaggggtaaataggaccacattcgttctgacagccaa  
caacgtgccactagcaggacagttatggaggttatattatgtaattattgttagctgataaatgatttacagaaagcgtgatgttcaactgggctg  
cttattcagcaatccccacgcataatttactcaaagagaaagaattttgatgtaagtttattgaacgtggaactttggcgtggggcatttatggctg  
ctatcacacaaatcgcgagcagagtaccctggattatataacacaactcactaaaatcgctcaaaattgggggtacgggtagcgcggc  
agctcatcaggggaacagcacctagtgcagtttaattgatagatcttcagaacgaaatcaattttcgcagtatcattacgttcaagaaact  
aaagtgttgagaaattaggaacgaaaaaagctactatagaaattgtagcctgtctcaactgctgtcctcgctttgactgcctaagtatat  
gccgcaatggcgataagcgggagtgctggtcagatctgtgtaaaaaaagatagcaataaaaaattatgaattaaacagtagtcttgaat

ttaaacaagtgatcttgactgaatacttccatcaatgagtcgctaaaatgaaaatggctgcacaatctcctccgcataatcttaaaaggcagcaat  
tagccagttgatcaccctacatttccacagaaacgaaaaagtgtaatagtttttgcggccaatatcgtaagctctagcggtagccttagctttatg  
attgtgcaagaaagttgccttttgactctcctcagggtgcagtattaacaacggcgtgaatgttaagttatttttcatcaaactgacttg  
atacttctcggtagtgcgtaattggattataccattaaggtgtcaccagtgtaaaaatttgcacggtacttgcaactacgtggaaggtaag  
ttactcaacgcaaagaaacgtaacattttacaatttttagctgcagtactatgtttaagtaatccaaagggaaactattgttatacccagaattat  
ttacattcgtttctagttcataaacaatgaatacctattgaatggatagaaattctgacttgattttacgagttattattgctgacattagtccaaagac  
atctcagttttctcctacaaccaatgaggaggctagccagggtgctgcccataaaatagccaataaagcggcaactttctg**ATGT**  
**CTTGCATTTTTTCCGCTGACTTGGGAGTAGAGTACAGCTGCGCGGAGTCGCGTATTACAAATCT**  
**TGTACTTTGCATTCTGTGCATACGTGAGGAAAAAGCAGCACCTGTTGTGAAAAAAGATAAATTT**  
**CTTTTTTTCATTTTTCTATCCTCAAAGGAAAATCTTTTCTGCGAAATTTCTAGCCGCTCTTCAGTT**  
**TCCGAAGTAAAGTCGCTGAGGGCGAAAAACAACCTTTATTGCCCACACGCTGTTATAGGCTTC**  
**CAGGGAGCAAAGCGCAATTGGGAATAAGGTTTCCTCAATTGAATGGTTTGCTTCGCCTACAG**  
**CATTA**accagaaggtaatgtatctctgtatgtccgtaacagatctgtccattaattgttttttcttcaggtaggctgagcccactttgtagta  
gctccctaccattacttttgcctttagttattggctttgatttttcttctatgacaatcccgttgagcaaccttgcaagggtcttttgaaaaaag  
gcgtgggcaagatctctgtat.....

## Supplementary information of the intergenic site CS6 for CRISPR-Cas9-based integration

[CS6 region, Chromosome VII]

ataaaa**TGAAACGGACAGGAATTGAACCTGCAACCCTTCGATTGCAATCTTATTCCGTGGAATTT**  
**CCAAGATTTAATTGGAGTCGAAAGCTCTACCATTGAGCCACCGCTTC**atcttgaaatatcgaagataaca  
tttactgtctg**ccgaaattctgt**gttgcataatggtgaattagaatctcttaaaatagctactcatactctcataactaatccattagtgacatat  
gaagtaatcggacgccacacatcattgatgttcacgatggagaatgataacacactaagtgccattgtgggcaaagtaagtaaacacctatt  
gctcaaatgatcaactgggtgttgcacatatcggatgtaagtcatgacattgaaatcataatgatgctttcatgataatcatatgagcatgtttaatat  
tactaataaggctgtattctatactctcttatataagaagaatctgcatttatcttgattgacactacagttcaacaattaattaccaacagaa  
ttaaftactacatcggtcacaagctactacggtatcacacaatgtaaaaatgacacaaaaatggaaaaccgcatcagatttaattggggc  
tgaaacacaagaattcataatgtgatagaataatgggtgaagtgataaagaagaatataatattactgtgtagaaatatcaatttccctttgtg  
agttctcata**acctcgaggagaagtttttaccctctccacagatc****gatacttattcattaagaaaatggg**acaccaaggttacggaaaaatcta  
**cccggtctacctaattactctcttgccgactagtttccgaaaaaacaggtaaattctctttagataaagataaataaaacttcacagccatt**  
cactcacacaaaactagtccttaggggtgcgtataatgatctgtacatcttattctatatacttaccgtgatttttctttctcaattctgttcgcaaata  
aaaagatattcgtgttggagaacactagttccggtttgtattcaacctggaaatttacaatagatcttcatcatcgtatgtctaccatgttaatctc  
ccgttaaactgtttcacgtatcaagattatgcatctattcctggcgaaacataatccttacaacaaacattgtcattacacaagtgtaaggggtaa  
tgaaaagtaattttgtacaagtagcgaattcgtttattcaagaacactaaggatcgt**catttccctttctgaccg**atgttccttcttttgcattttt  
tccgagtcattctcgttttgagttttcctagtcattaaattgtcacctactctcgaaaaagaaacgacaaatgctcctagtgccgttttgcg  
aagcttgaaaaaaaaaaattgcaaattathtaattttgctgctaaggagtggaagtaggtgcattccgccttattgatccacctgttagattgttgcgat  
cgttatagtgctagttgtccattgtgtgcataaaagatagctttgggagaaaattca**TCAAACAACATATCATCAGCGTTAT**  
**TACAATTCATTGTCCTTCCAAGTTTTTTTTGACGTATAATATTATCGCTATCTGACTCATTAGTAC**  
**ACAAATACAGATATACAACCTCAAATCAAAAATGCCTAGAAACCCATTGAAAAAGGAATATT**  
**GGGCAGATGTAGTTGACGGATTCAAGCCGGCTACTTCTCCAGCCTTCGAGAATGAAAAAGAAT**  
**CTACTACATTTGTTACCGAACTAACTTCCAAAACCGATTCTGCATTTCCATTAAGTAGCAAGGA**  
**TTCACCTGGCATAAACCAAACCACAAACGATATTACCTCTTCAGATCGCTTCCGTTCGTAATGAA**  
**GACACAGAGCAGGAAGACAT**caacaacacca
